# Supplementary material for: Ion sieving membrane for direct seawater anti-precipitation hydrogen evolution reaction electrode
Source: Royal Society of Chemistry journal article supplement (doi:10.1039/d3sc04532c), 2023-01-01
Supplement: d3sc04532c1.pdf [file d3sc04532c1.pdf]

## **Supplementary information**

### **Ion sieving membrane for direct seawater anti-precipitation hydrogen evolution reaction electrode**

Qianfeng Liu, Zhao Yan, Jianxin Gao, Hefei Fan, Min Li and Erdong Wang\*

Dalian National Laboratory for Clean Energy, Dalian Institute of Chemical Physics, Chinese Academy of Sciences, Dalian 116023, China

\* Corresponding author.

E-mail: edwang@dicp.ac.cn

## Experimental

### Materials

Nickel chloride ( $\text{NiCl}_2 \cdot 6\text{H}_2\text{O}$ ,  $\geq 98.0\%$ ), cobalt chloride ( $\text{CoCl}_2 \cdot 6\text{H}_2\text{O}$ ,  $\geq 99.0\%$ ), ferrous chloride ( $\text{FeCl}_2 \cdot 4\text{H}_2\text{O}$ ,  $\geq 98.0\%$ ), magnesium chloride ( $\text{MgCl}_2 \cdot 6\text{H}_2\text{O}$ ,  $\geq 98.0\%$ ), calcium chloride ( $\text{CaCl}_2$ ,  $\geq 96.0\%$ ), aluminium chloride ( $\text{AlCl}_3 \cdot 6\text{H}_2\text{O}$ ,  $\geq 97.0\%$ ), potassium chloride ( $\text{KCl}$ ,  $\geq 99.5\%$ ), sodium chloride ( $\text{NaCl}$ ,  $\geq 99.5\%$ ), sodium hydroxide ( $\text{NaOH}$ ,  $\geq 96.0\%$ ), magnesium hydroxide ( $\text{Mg}(\text{OH})_2$ , 98%-102%), sodium sulphate ( $\text{Na}_2\text{SO}_4$ ,  $\geq 99.0\%$ ), sodium carbonate ( $\text{Na}_2\text{CO}_3$ ,  $\geq 99.8\%$ ), sodium nitrate ( $\text{NaNO}_3$ ,  $\geq 99.0\%$ ), hydrochloric acid ( $\text{HCl}$ , 37%), acetone ( $\text{CH}_3\text{COCH}_3$ ,  $\geq 99\%$ ) and chloroplatinic acid ( $\text{H}_4\text{PtCl}_6 \cdot 6\text{H}_2\text{O}$ , Pt = 37%) were obtained from Sinopharm Chemical, Tianjing or Nanjing Reagent. All the chemicals were used as received without purification. Nickel foam (thicknesses: 1.7 mm, density:  $320 \text{ g cm}^{-2}$ , pore size: 110 PPI) was obtained from Heze Tianyu Technology Development Co., Ltd. Nylon filter membrane (pore size of  $0.45 \mu\text{m}$ , membrane diameter of  $\Phi 50 \text{ mm}$ ) was purchased from Green Mall. Iridium and ruthenium oxide covered titanium felt ( $\text{IrRuO}_2\text{-Ti}$ , Ir:Ru=1:2, with total mass of  $12 \text{ g/m}^2$ ) was obtained from Kunshan. Seawater was obtained from Dalian, Liaoning province.

### Samples preparation

In a typical synthesis for  $\text{Ni}(\text{OH})_2\text{-NF}$  electrodes, NFs ( $1 \text{ cm} \times 2 \text{ cm}$ ) were pre-treated with acetone via ultrasonic cleaning for 15 min and dried at  $40^\circ\text{C}$  for 1 hour, followed by ultrasonic cleaning with 3 M  $\text{HCl}$  for 10 min, and washing with RO water for several times. The wet NFs were immersed in 0.1 M  $\text{NiCl}_2$  solution and kept at  $25^\circ\text{C}$  for 1 d to 5 d, marked as  $\text{Ni}(\text{OH})_2\text{-NF-1d}$  to  $\text{Ni}(\text{OH})_2\text{-NF-5d}$ . The obtained  $\text{Ni}(\text{OH})_2\text{-NF}$  electrodes were washed with RO water for several times and stored in RO water before use. The  $\text{FeOOH/NF}$ ,  $\text{Co}(\text{OH})_2\text{/NF}$ ,  $\text{Ni}_2\text{Fe}_1\text{LDH/NF}$ ,  $\text{Ni}_2\text{Co}_1\text{LDH/NF}$ ,  $\text{Mg}_2\text{Al}_1\text{LDH/NF}$  electrodes were fabricated via the similar condition to  $\text{Ni}(\text{OH})_2\text{-NF-3d}$ , the difference was the  $\text{NiCl}_2$  solution was replaced by  $\text{FeCl}_2$ ,  $\text{CoCl}_2$ ,  $\text{MgCl}_2$ , or  $\text{AlCl}_3$  with total concentration of 0.1 M. The prepared method of  $\text{Ni}(\text{OH})_2\text{-NS-NF}$  electrode and  $\text{Pt-NF}$  electrode was obtained from our previous work.<sup>1</sup> The  $\text{Ni}(\text{OH})_2\text{-Pt-NF}$  electrode was fabricated from  $\text{Pt-NF}$  electrode with the same condition to  $\text{Ni}(\text{OH})_2\text{-NF}$  electrode.

### $\text{Ni}(\text{OH})_2$ membrane preparation

The  $\text{Ni}(\text{OH})_2$  membrane was peeled off from abundant  $\text{Ni}(\text{OH})_2\text{-NF}$  electrodes via ultrasound over 24 h, then centrifuged and washed with ultra-pure water for several times. The obtained  $\text{Ni}(\text{OH})_2$  was dispersed in water with concentration about 1wt.%. 5 mL of  $\text{Ni}(\text{OH})_2$  stirring

turbid liquid was diluted into 80 mL and vacuum filtrated on nylon filter membrane to fabricate the  $\text{Ni}(\text{OH})_2$  membrane with working size of  $\Phi 40$  cm. Before permeability test, the  $\text{Ni}(\text{OH})_2$  membrane was sealed with a 2  $\text{cm}^2$  opening in copper tape to control the ions transfer area.

### Characterization

The crystal structures were characterized by X-ray diffraction (XRD, Rigaku MiniFlex 600, 40 kV, 15 mA) using  $\text{Cu K}\alpha 1$  radiation at a scanning rate of  $5^\circ \text{ min}^{-1}$ . The microscopic features of the samples were characterized by scanning electron microscopy (SEM, JEOL JSM-7800F and Hitachi S-5500) coupled with energy-dispersive X-ray spectroscopy (EDS, Oxford X-Max) and high-resolution transmission electron microscopy (HRTEM, JEOL JEM-2100, 200 kV). X-ray photoelectron spectroscopy (XPS) analysis was conducted on an Thermo Scientific K-Alpha X-ray photoelectron spectrometer (Thermo Fisher Scientific Inc.) with  $\text{Al K}\alpha$  radiation in an ultrahigh vacuum. Zeta potential of the sample was measured by the nano laser particle size analyser (Zetasizer Nano, Malvern Panalytical) in 3.5%  $\text{NaCl}$  solution at pH of 10, which was adjusted by 1 M  $\text{NaOH}$  solution.

### Permeability of Ions

The permeability of the ions was tested by a diffusion cell. The feed solution: 1  $\text{mol L}^{-1}$  aqueous solution with ultra-pure water, including  $\text{KCl}$ ,  $\text{NaCl}$ ,  $\text{CaCl}_2$ ,  $\text{MgCl}_2$ ,  $\text{NaOH}$ ,  $\text{NaNO}_3$ ,  $\text{Na}_2\text{CO}_3$  and  $\text{Na}_2\text{SO}_4$  with a varied hydrated diameter of cations or anions, respectively. The concentration of  $\text{MgCl}_2$  and  $\text{NaOH}$  solution also included 0.1, 0.3, 0.5 and 0.75 M. The permeate side: ultra-pure water. The ion concentration of the diffusion side was then calculated by following equation (Fig. S20).

$$\lg(\sigma) = a + \lg(c) \quad (1)$$

$\sigma$  is the conductivity of the solution,  $c$  is the concentration of the solution.

### Electrochemical measurements

Electrochemical measurements were carried out on CHI 760D electrochemical workstation in a traditional three-electrode cell at  $25 \pm 1^\circ\text{C}$ . The NF,  $\text{Ni}(\text{OH})_2$ -NF, Pt-NF or  $\text{Ni}(\text{OH})_2$ -Pt-NF as the working electrode (WE) with an effective projected area of  $0.5 \text{ cm}^2$ , pure Mg rod as the counter electrode (CE) and a double-salt-bridge saturated calomel electrode (SCE) as the reference electrode was measured in seawater or seawater with saturated  $\text{Mg}(\text{OH})_2$ . The saturated  $\text{Mg}(\text{OH})_2$  seawater was obtained by adding of  $\sim 0.2 \text{ g}$   $\text{Mg}(\text{OH})_2$  powder into 1 L seawater and kept stirring for one night. The volume of the electrolyte was 40 mL for each

chamber when the WE and CE was separated with AEM. All polarization curves were recorded at a scanning rate of  $5 \text{ mV s}^{-1}$  with iR-compensation unless otherwise noted.

### **Directly seawater electrolyser measurements**

The directly seawater electrolyser was assembled by prepared  $\text{Ni(OH)}_2$ -Pt-NF or Pt-NF HER electrode and  $\text{Cr}_2\text{O}_3$ -IrRuO<sub>2</sub>-Ti OER electrode with working area of  $10 \text{ cm}^2$ . The  $\text{Cr}_2\text{O}_3$  layer on the IrRuO<sub>2</sub>-Ti ( $\text{Cr}_2\text{O}_3$ -IrRuO<sub>2</sub>-Ti) was fabricated with the same condition to the reference.<sup>24</sup> The diaphragm was the commercial PP/PE membrane with thickness of  $210 \mu\text{m}$ . The seawater electrolyser under  $40^\circ\text{C}$  was flowed by seawater with saturated  $\text{Mg(OH)}_2$  at a rate of  $12 \text{ mL min}^{-1}$  under control of a peristaltic pump.

### **Magnesium seawater battery measurements**

The MSWB was assembled by  $\text{Ni(OH)}_2$ -Pt-NF, Pt-NF or NF cathode and Mg alloy (AZ31) anode with working size of  $2 \times 2 \text{ cm}^2$ . The distance between cathode and anode was  $0.5 \text{ mm}$ , and there was no diaphragm between the electrodes. All the MSWBs were tested in seawater with saturated  $\text{Mg(OH)}_2$ . Before the polarization test, the MSWBs were tested at current density of  $5 \text{ mA cm}^{-2}$  for  $5 \text{ min}$  to reach a stable potential, and the test time for each current density point in i-V curves was  $2 \text{ min}$ . The precipitation mass on the electrodes were calculated by the mass difference of electrodes before and after discharge measurement.

### **Simulations**

A monolayer  $\text{Ni(OH)}_2$  nanosheet with 0 charge or +10 electronic charge was built by  $13 \times 11$  Ni atoms as framework, which contained a  $5 \times 3$  Ni atoms ( $1.1 \times 1.4 \text{ nm}^2$ ) opening in the centre of the nanosheet. To simulate the transfer rate of  $\text{Mg}^{2+}$ ,  $\text{Na}^+$ ,  $\text{Cl}^-$ ,  $\text{OH}^-$  and  $\text{H}_2\text{O}$ , and avoid the deposition influence between  $\text{Mg}^{2+}$  and  $\text{OH}^-$ , the simulation was divided into  $\text{MgCl}_2$  and NaOH solution system. The  $\text{MgCl}_2$  and NaOH solution was up to the  $\text{Ni(OH)}_2$  sheet at  $300 \text{ K}$  and  $1 \text{ atm}$  in a box with size of  $3.0 \times 4.0 \times 12.0 \text{ nm}^3$ . The  $\text{MgCl}_2$  solution contained 3000  $\text{H}_2\text{O}$ , 40  $\text{Mg}^{2+}$  and 80  $\text{Cl}^-$ , while NaOH solution contained 3000  $\text{H}_2\text{O}$ , 40  $\text{Na}^+$  and 40  $\text{OH}^-$ . The  $\text{Ni(OH)}_2$  sheets were set as rigid to ensure that the atoms of the substrates were fixed during the simulation. The temperature of each confined solution was maintained at  $300 \text{ K}$  by using a Nosé–Hoover thermostat with a damping factor of  $100 \text{ fs}$ . The solutions were allowed to equilibrate for  $10 \text{ ns}$  with a time step of  $1 \text{ fs}$  by using NVT simulations. Then, another  $7 \text{ ns}$  of simulation was performed for further analysis, and let particles and ions across through the opening on  $\text{Ni(OH)}_2$  sheet driven by a transparent wall with  $1 \text{ atm}$  pressure on the top of the system. In also cases, the water transfer was referred to the tip3p model, the ions transfer and  $\text{Ni(OH)}_2$  potential parameters were from the reports.<sup>2-4</sup> The Lorentz–Berthelot mixing rule was

adopted for the van der Waals interactions of different kinds of atoms. And all the passed ion and water numbers was counted by the LAMMPS software package.<sup>55</sup>

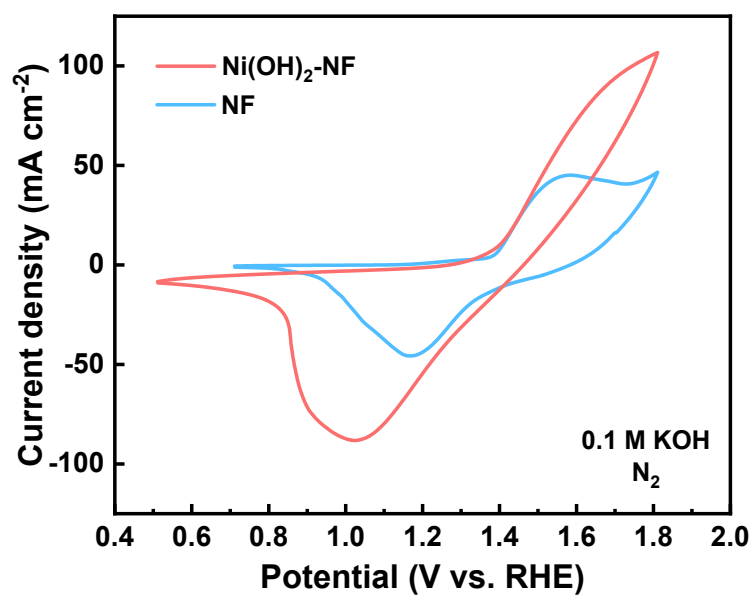

**Fig. S1** CV curves of NF and Ni(OH)<sub>2</sub>-NF electrode tested in N<sub>2</sub> saturated 0.1 M KOH at scan rate of 50 mV s<sup>-1</sup>.

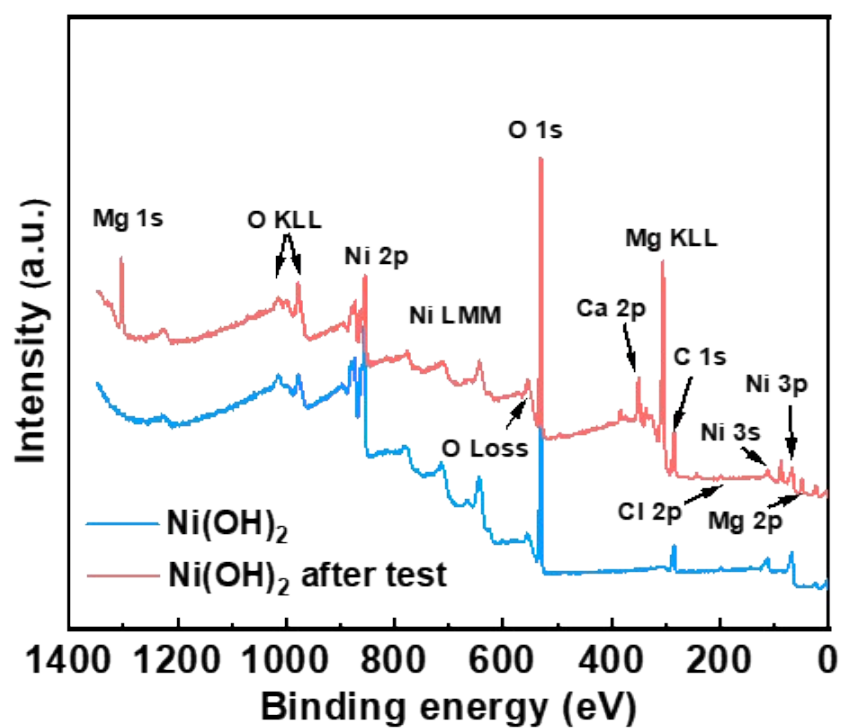

**Fig. S2** XPS survey spectra of  $\text{Ni(OH)}_2$  membrane before and after test in seawater.

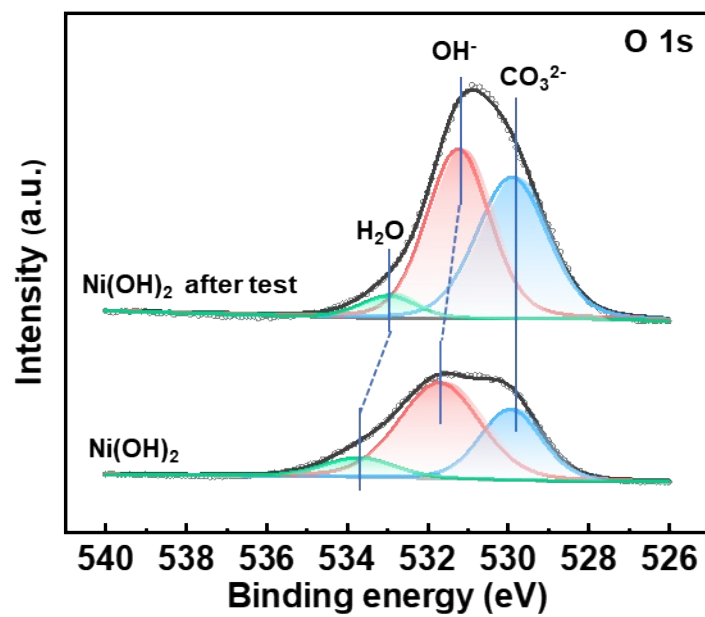

**Fig. S3** High-resolution XPS spectra for O 1s of Ni(OH)<sub>2</sub> membrane before and after test in seawater.



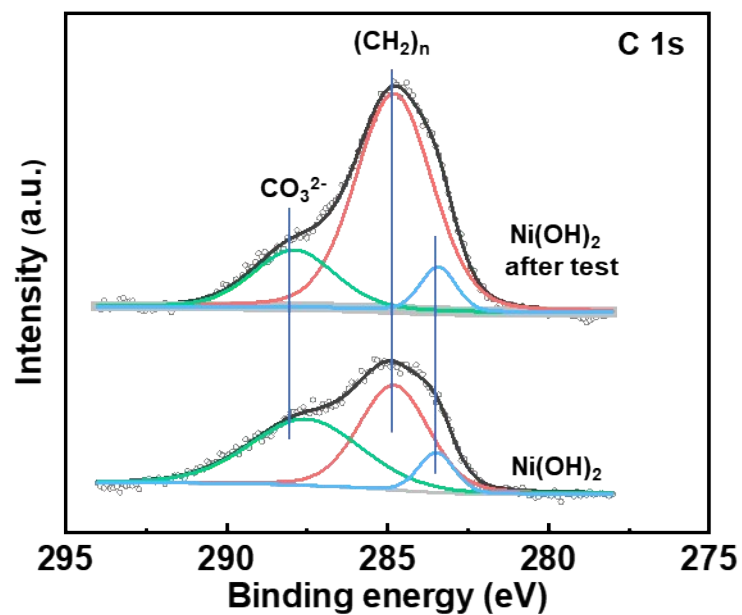

**Fig. S4** The high-resolution XPS spectra of C 1s for Ni(OH)<sub>2</sub> membrane on Ni(OH)<sub>2</sub>-NF electrode before and after test in seawater. The binding energy at 284.8 eV was chosen as the correction value.

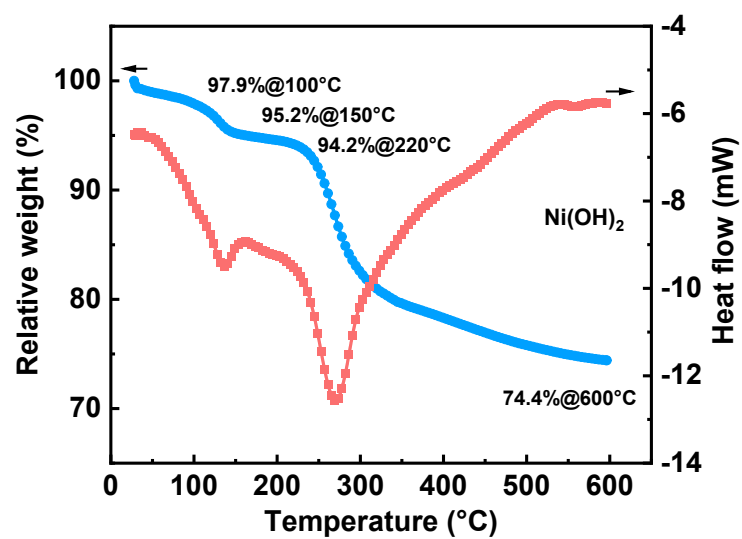

**Fig. S5** Thermal gravimetric analysis of the Ni(OH)<sub>2</sub> membrane.

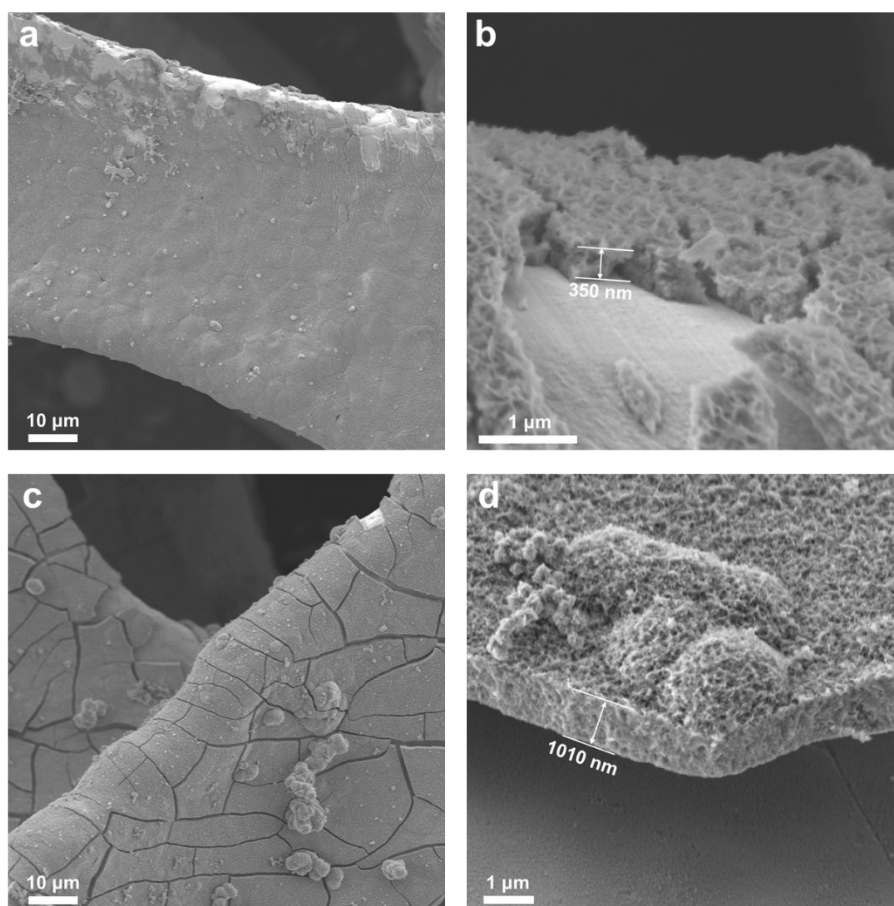

**Fig. S6** SEM images of (a, b)  $\text{Ni(OH)}_2\text{-NF-1d}$ , and (c, d)  $\text{Ni(OH)}_2\text{-NF-5d}$  electrodes.

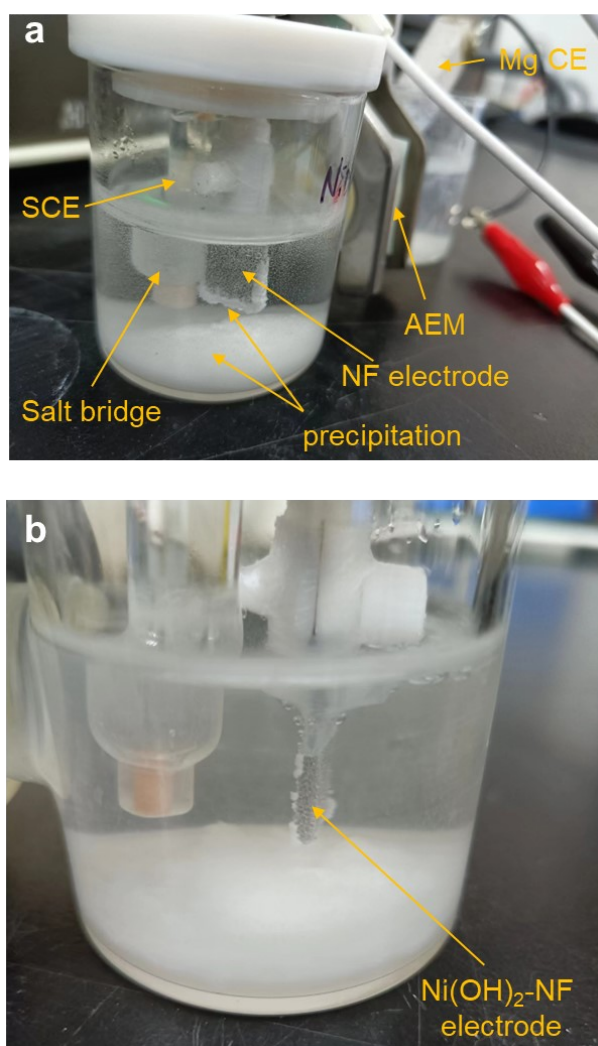

**Fig. S7** Photograph of (a) NF and (b) Ni(OH)<sub>2</sub>-NF electrode during test.

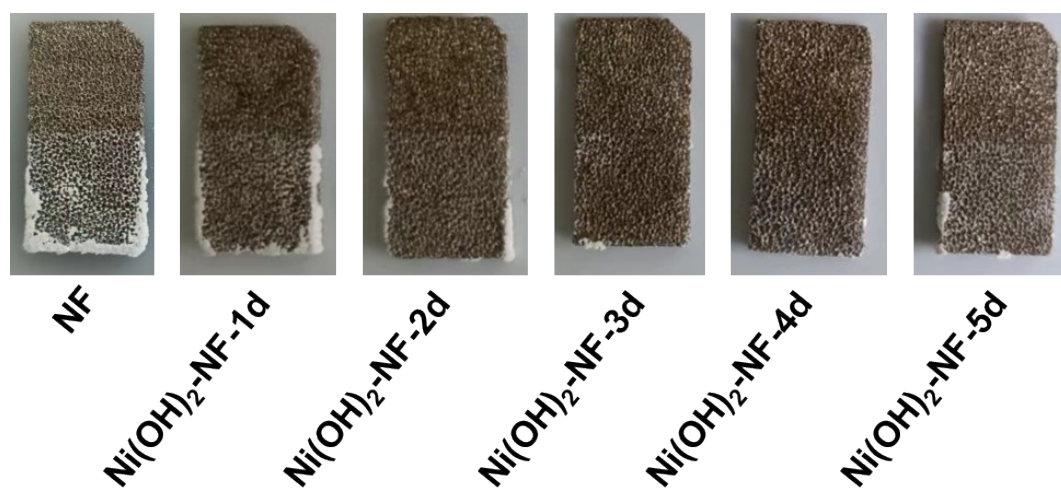

**Fig. S8** Photograph of NF and  $\text{Ni(OH)}_2$ -NF electrodes after being tested in SW+AEM at current density of  $10 \text{ mA cm}^{-2}$  for 12 h.

The upper of the electrodes were protected by the PTFE film to prevent the contact between the electrodes with electrolyte, so the upper of the electrodes were not the reaction area for the electrodes.

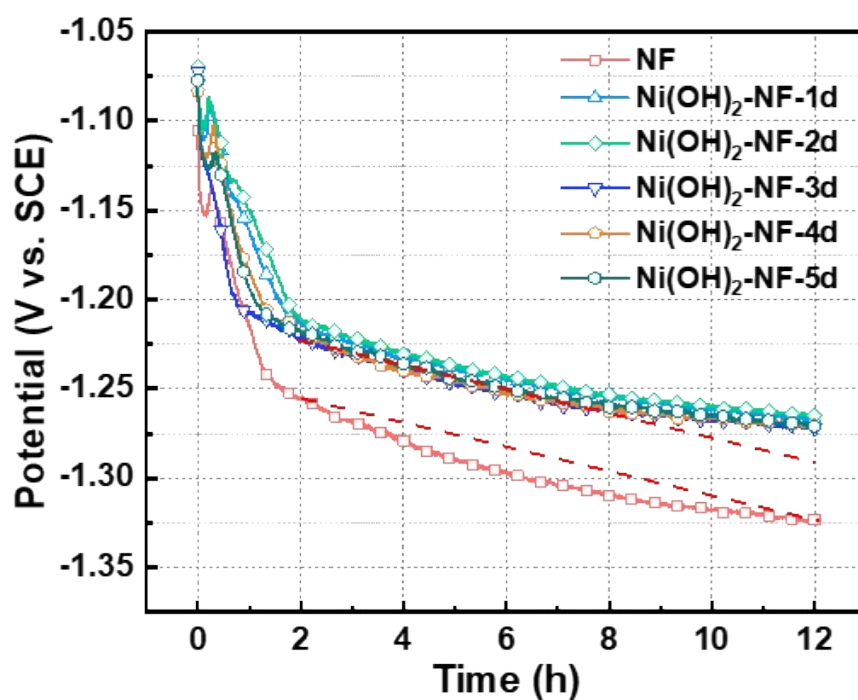

**Fig. S9** Chronopotentiometry curves of NF and Ni(OH)<sub>2</sub>-NF electrodes in SW+AEM at current density of 10 mA cm<sup>-2</sup> for 12 h.

The rapid dropped potential for all electrodes was mainly caused by the zooming pH during the initial ~2 h measure. According to the parallel red dashed line from 2 to 12 h, the increased overpotential of Ni(OH)<sub>2</sub>-NF electrodes was less than that of NF electrode with the same condition, indicating that the electrode surface Ni(OH)<sub>2</sub> membrane can promote its stability.

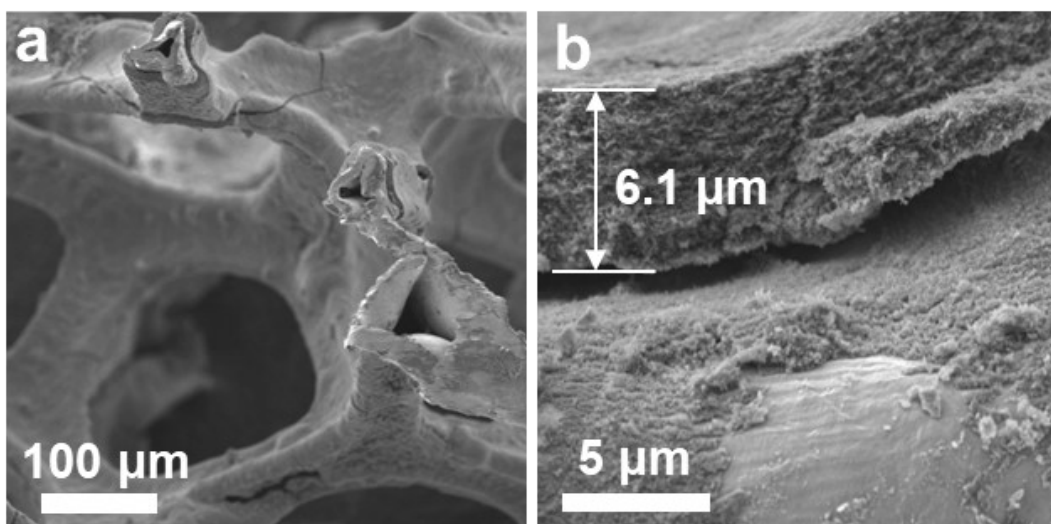

**Fig. S10** SEM images of  $\text{Ni(OH)}_2\text{-NF-3d}$  electrode after tested in seawater at current density of  $10 \text{ mA cm}^{-2}$  for 12 h, the working electrode and counter electrode was separated with AEM.

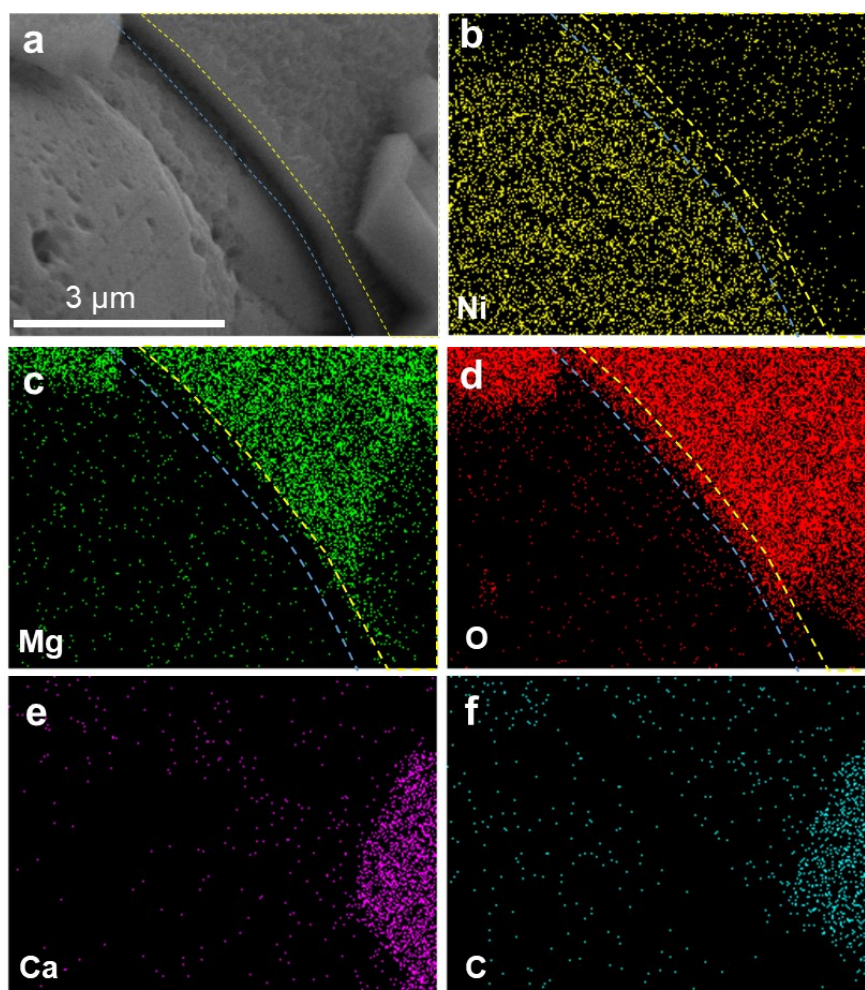

**Fig. S11** a) SEM image and the corresponding energy-dispersive X-ray spectroscopy (EDS) elemental mapping of b) Ni, c) Mg, d) O, e) Ca and f) C for Ni(OH)<sub>2</sub>-NF-3d electrode after tested in seawater at current density of 10 mA cm<sup>-2</sup> for 12 h, the working electrode and counter electrode was separated with AEM.

The yellow and blue dashed lines were located at the same position at each image. It is the NF substrate below the blue line, it is the Ni(OH)<sub>2</sub> membrane between the two lines, and it is the Mg-based compound up the yellow line. According to the EDS elemental mapping, the Mg-based compound was mainly precipitated upon the Ni(OH)<sub>2</sub> membrane, suggesting the outstanding inhibition effect of Mg<sup>2+</sup> transfer in Ni(OH)<sub>2</sub> membrane.



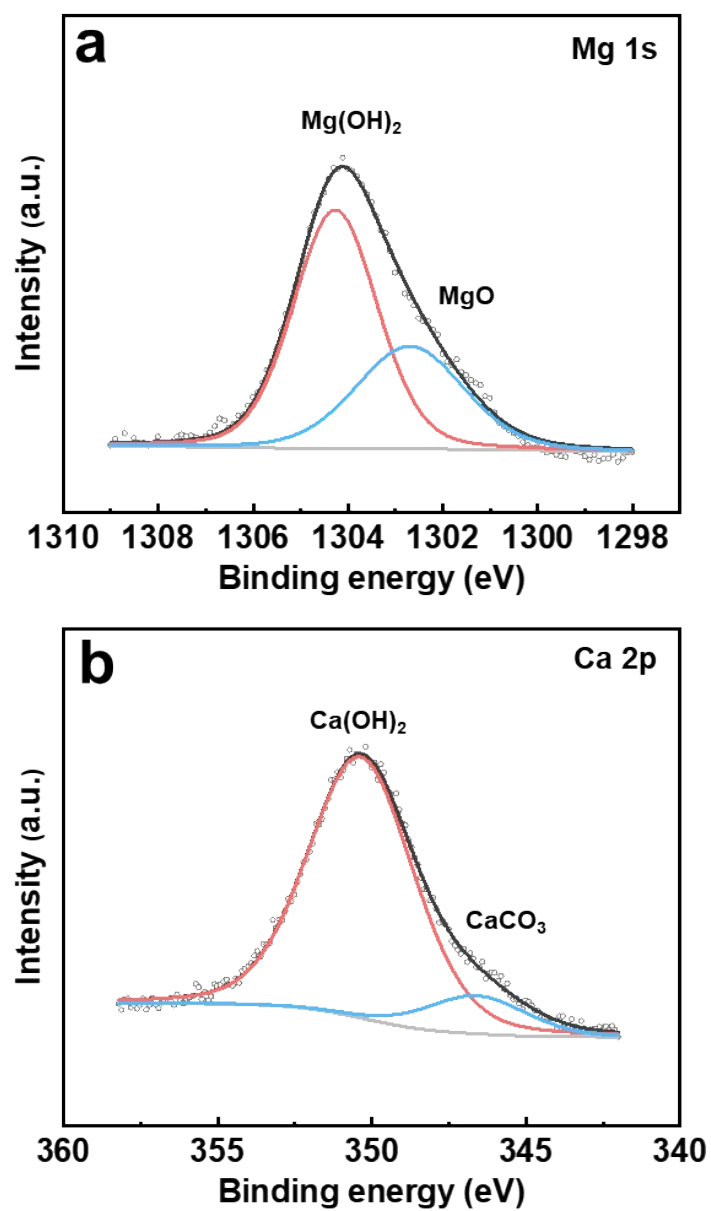

**Fig. S12** High-resolution XPS spectra for (a) Mg 1s and (b) Ca 2p.

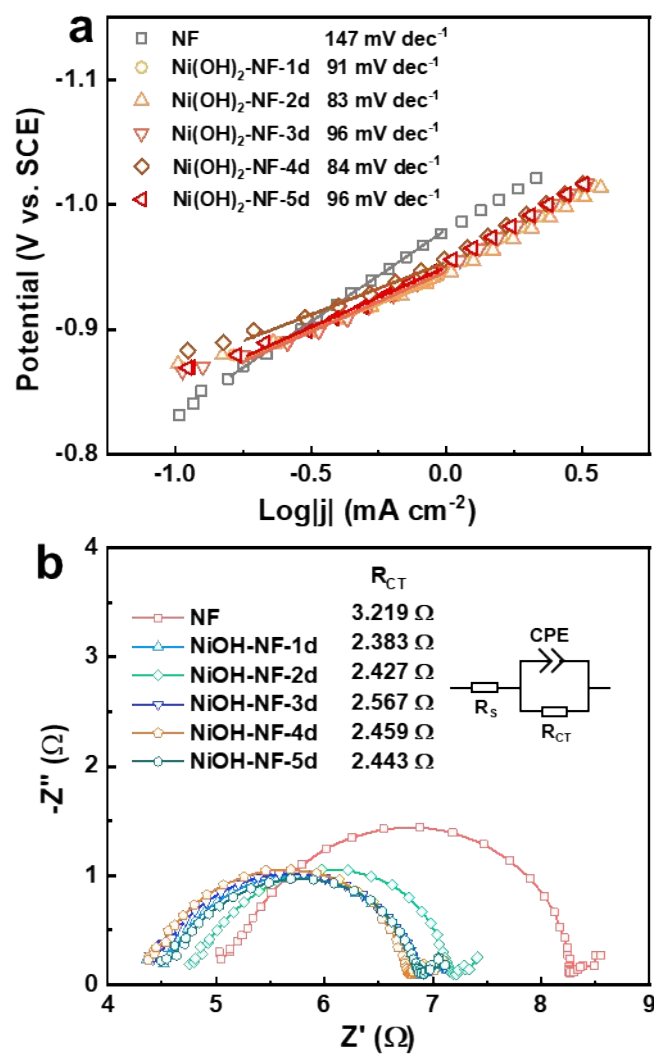

**Fig. S13** (a) Tafel slopes and (b) electrochemical impedance spectroscopy (EIS) of NF and Ni(OH)<sub>2</sub>-NF electrodes in SW+AEM.

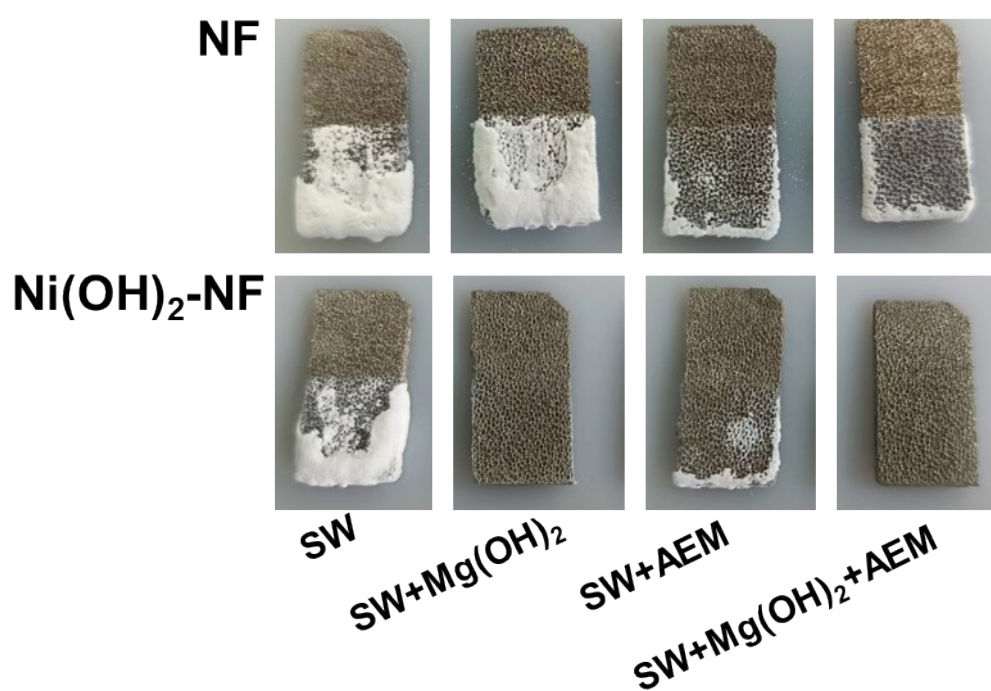

**Fig. S14** Photographs of NF and Ni(OH)<sub>2</sub>-NF electrodes after measurement under different conditions at 10 mA cm<sup>-2</sup> for 12 h.

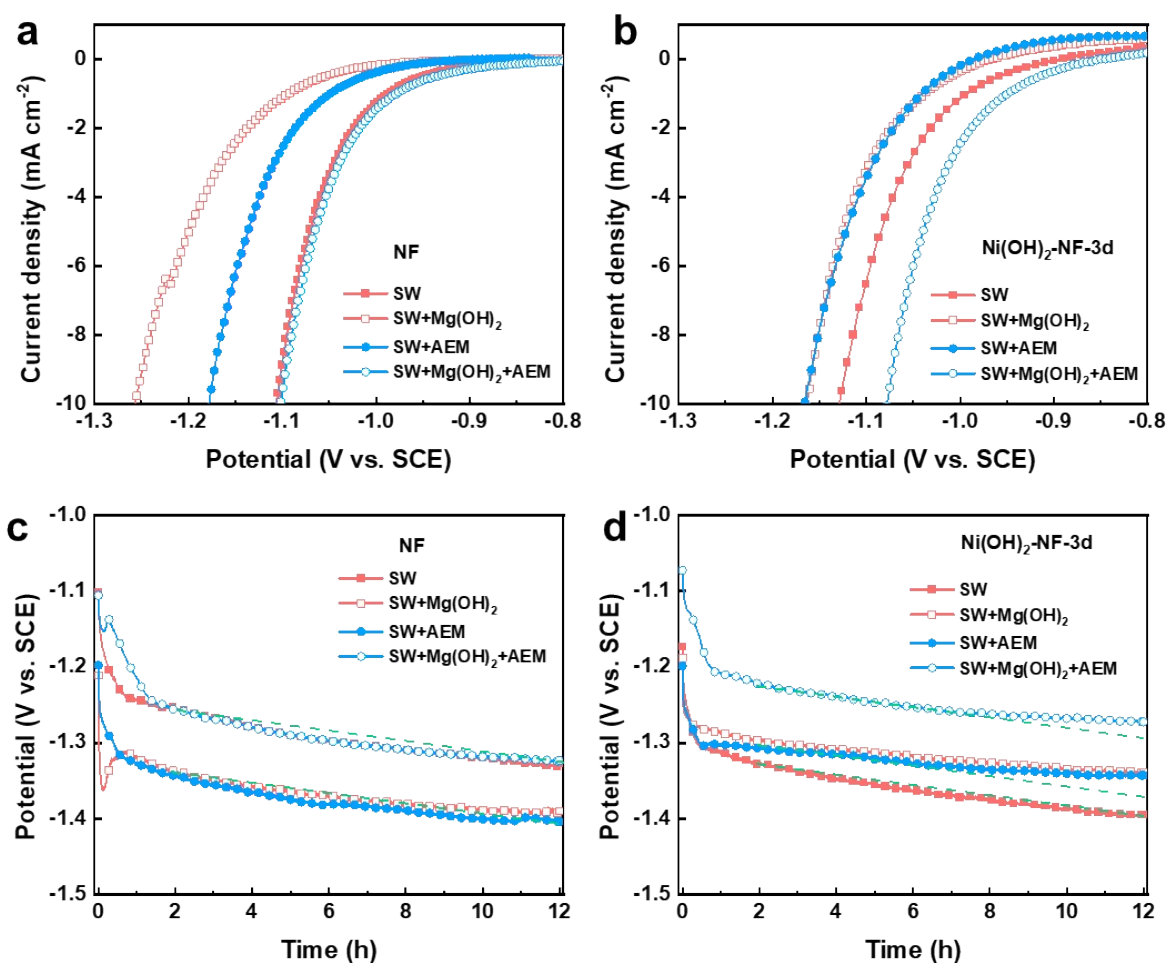

**Fig. S15** LSV curves of (a) NF and (b) Ni(OH)<sub>2</sub>-NF-3d electrode, and chronopotentiometry curves at 10 mA cm<sup>-2</sup> of (c) NF and (d) Ni(OH)<sub>2</sub>-NF-3d electrode measurement under different conditions.

According to the parallel dashed line from 2 to 12 h, the increased overpotential of Ni(OH)<sub>2</sub>-NF electrode was less than that of NF electrode under different conditions, except for in SW, which was in accord with the precipitation mass on the electrode surface.

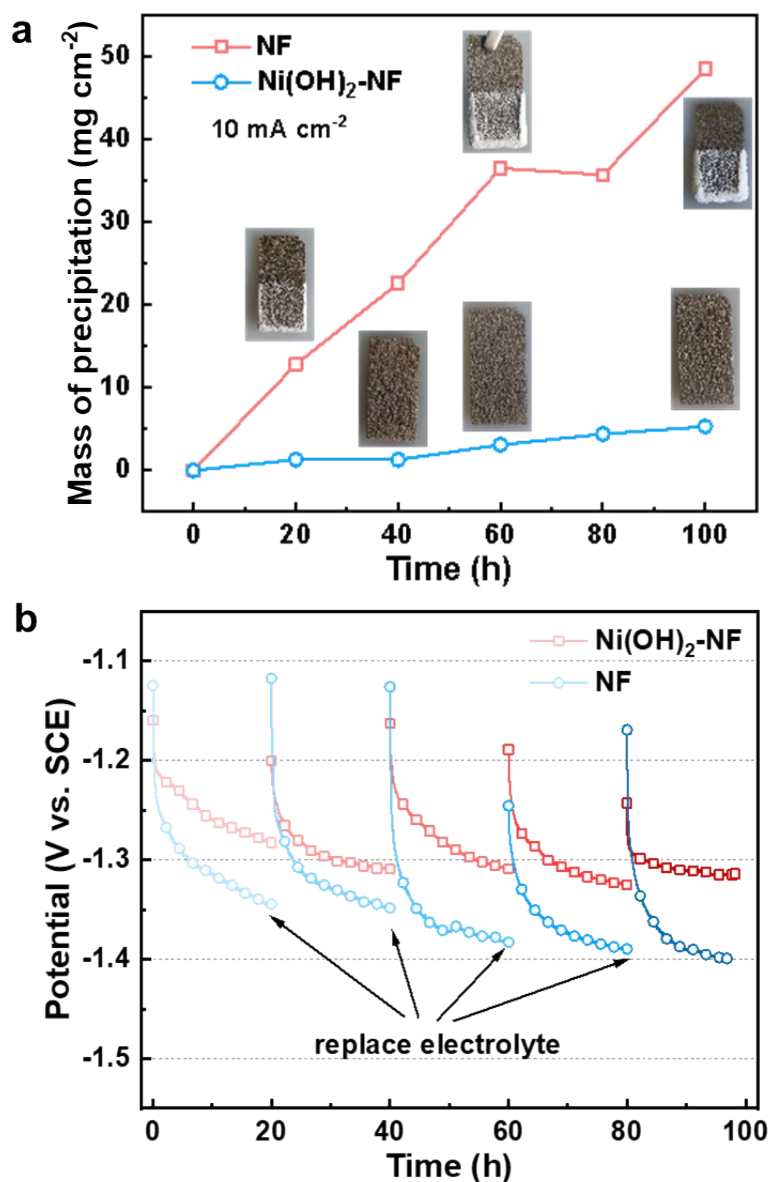

**Fig. S16** (a) Mass of precipitation and (b) chronopotentiometry curves on the NF and Ni(OH)<sub>2</sub>-NF electrodes under different measure time at current density of 10 mA cm<sup>-2</sup>, the working electrode and counter electrode was separated with AEM, insets were the corresponding photographs.

The reduced precipitation mass for NF electrode at 80 h was mainly caused by the fall off during wash and dry.

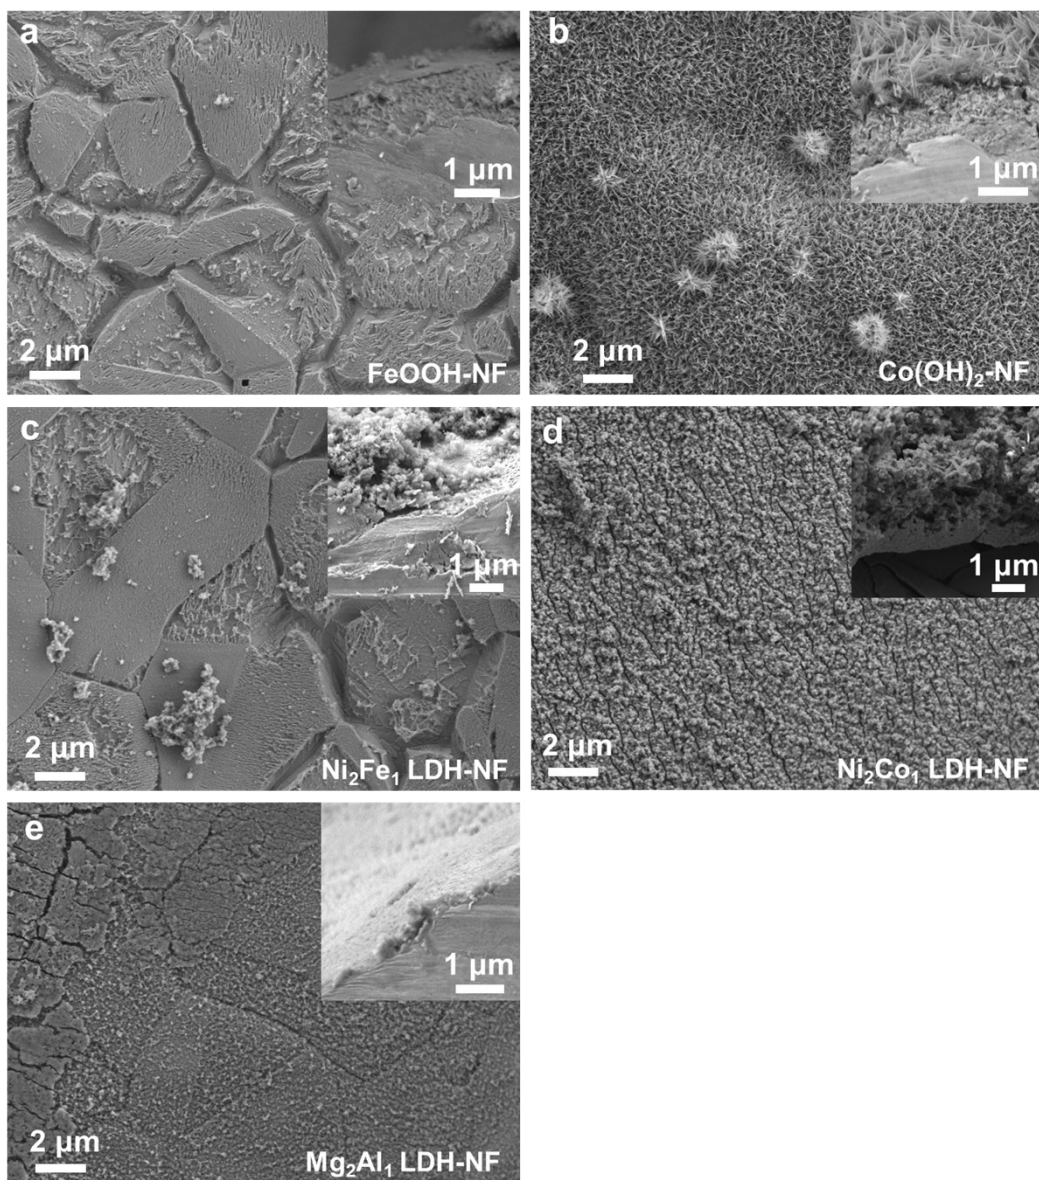

**Fig. S17** SEM images of (a) FeOOH-NF, (b) Co(OH)<sub>2</sub>-NF, (c) Ni<sub>2</sub>Fe<sub>1</sub> LDH-NF, (d) Ni<sub>2</sub>Co<sub>1</sub> LDH-NF, and (e) Mg<sub>2</sub>Al<sub>1</sub> LDH-NF electrodes.

The membranes on FeOOH-NF, Ni<sub>2</sub>Fe<sub>1</sub> LDH-NF and Mg<sub>2</sub>Al<sub>1</sub> LDH-NF electrode were uneven, which led to much of exposed NF substrate. The membrane on Co(OH)<sub>2</sub>-NF electrode was uniform but needlelike, which might supply much nucleating sites for Mg(OH)<sub>2</sub>. The Ni<sub>2</sub>Co<sub>1</sub> LDH-NF electrode generated the uniform membrane like Ni(OH)<sub>2</sub> membrane with thickness of 3.3 μm.

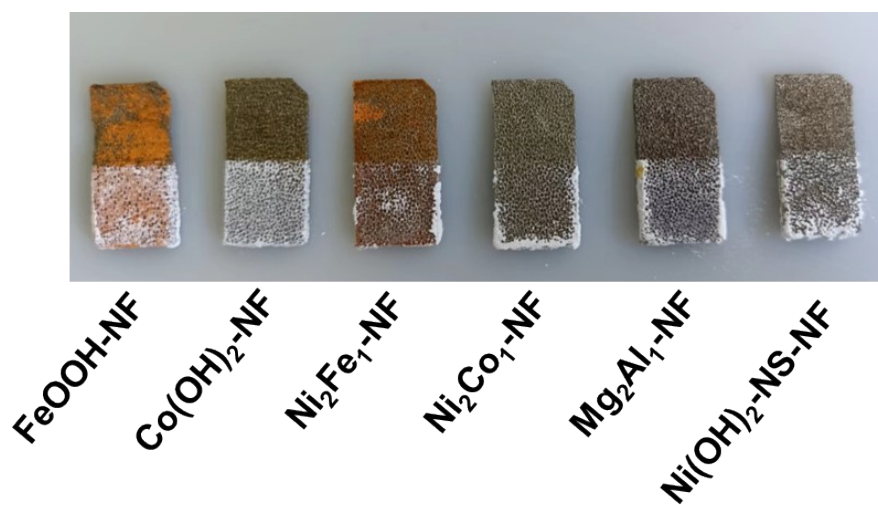

**Fig. S18** Photograph of FeOOH/NF, Co(OH)<sub>2</sub>/NF, Ni<sub>2</sub>Fe<sub>1</sub> LDH/NF, Ni<sub>2</sub>Co<sub>1</sub> LDH/NF, Mg<sub>2</sub>Al<sub>1</sub> LDH/NF, and Ni(OH)<sub>2</sub>-NS-NF electrodes after measurement at current density of 10 mA cm<sup>-2</sup> for 12 h, the working electrode and counter electrode was separated with AEM.

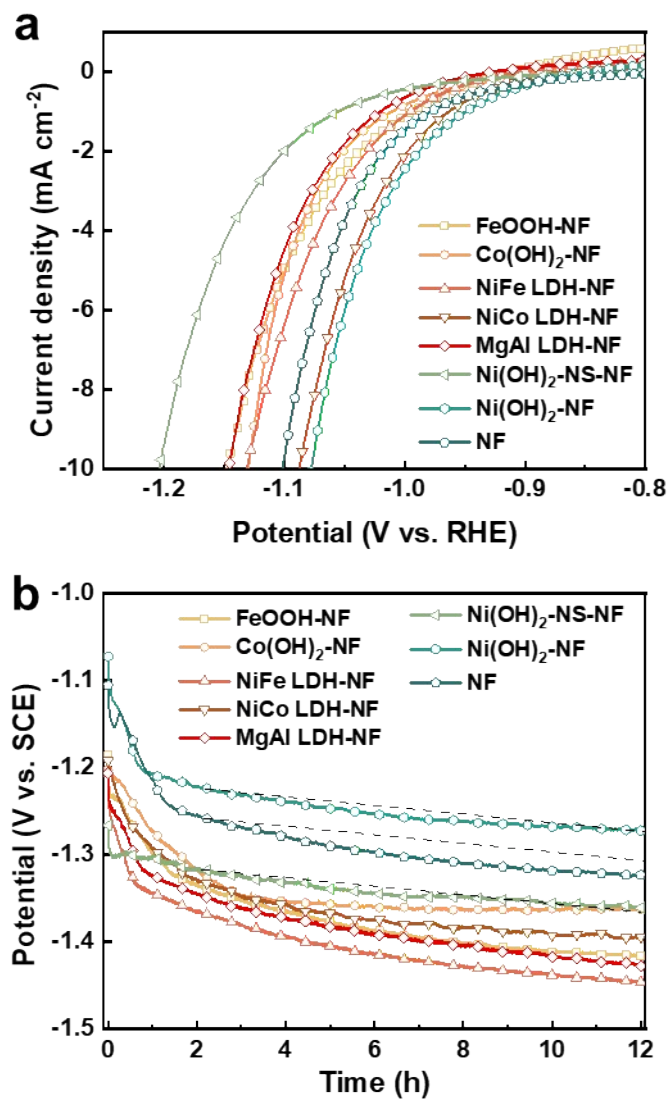

**Fig. S19** (a) LSV and (b) chronopotentiometry curves of FeOOH-NF, Co(OH)<sub>2</sub>-NF, Ni<sub>2</sub>Fe<sub>1</sub> LDH-NF, Ni<sub>2</sub>Co<sub>1</sub> LDH-NF, Mg<sub>2</sub>Al<sub>1</sub> LDH-NF, Ni(OH)<sub>2</sub>-NS-NF, Ni(OH)<sub>2</sub>-NF and NF electrode in SW+Mg(OH)<sub>2</sub>+AEM.



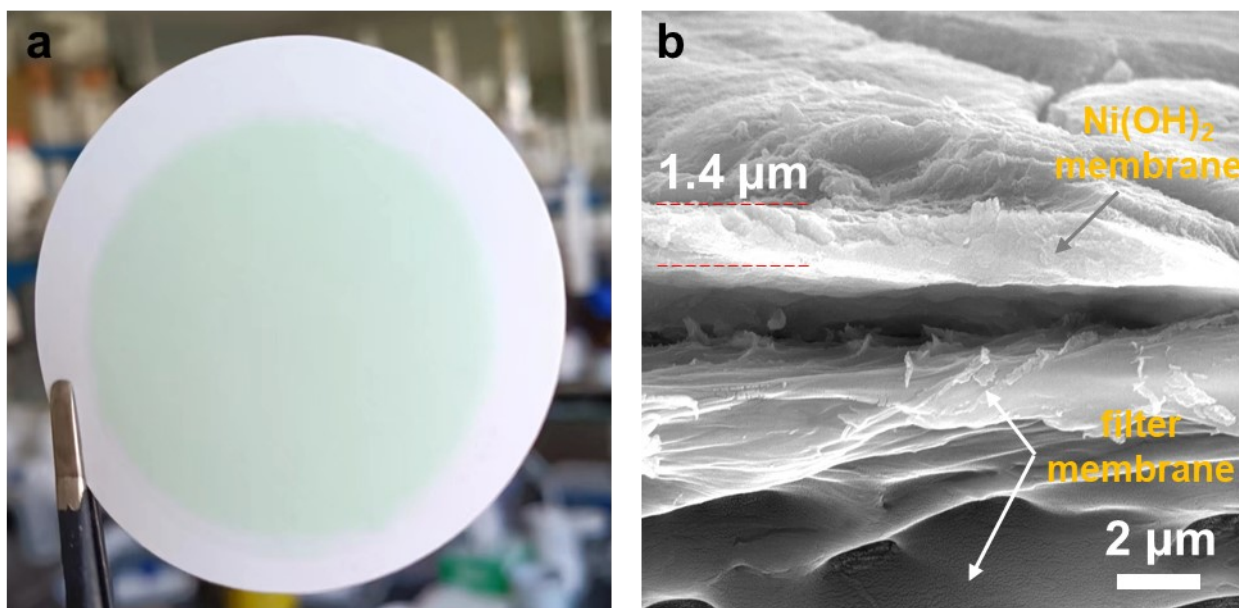

**Fig. S20** (a) Photograph and (b) SEM image of Ni(OH)<sub>2</sub> membrane coated on nylon filter membrane.

The Ni(OH)<sub>2</sub> membrane was peeled off from abundant Ni(OH)<sub>2</sub>-NF electrodes via ultrasound over 24 h, then centrifuged and washed with water for several times. The obtained Ni(OH)<sub>2</sub> was dispersed in water to store.

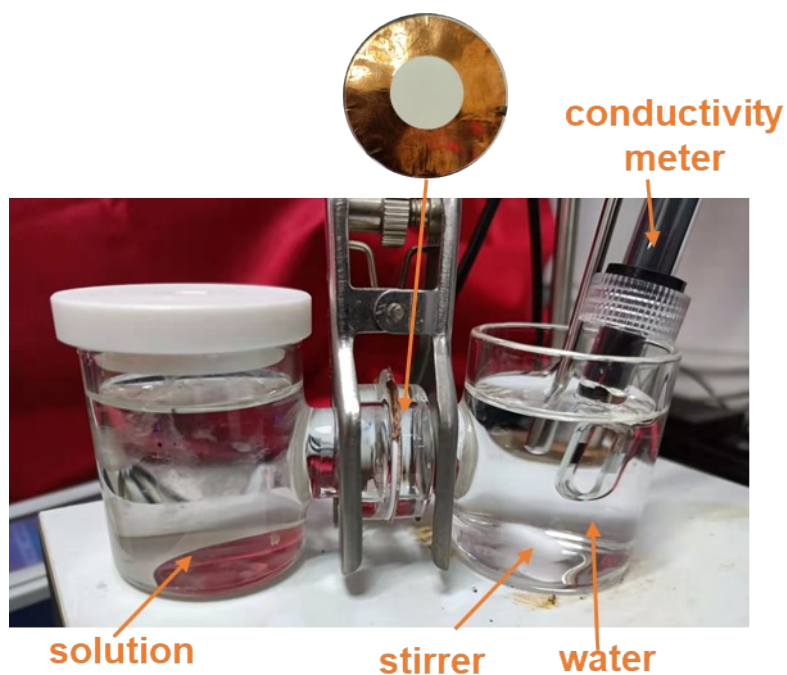

**Fig. S21** Photograph of  $\text{Ni(OH)}_2$  membrane test setup. The  $\text{Ni(OH)}_2$  membrane was filtered on the nylon filter membrane, and sealed with a 2 cm<sup>2</sup> opening in copper (Cu) tape.

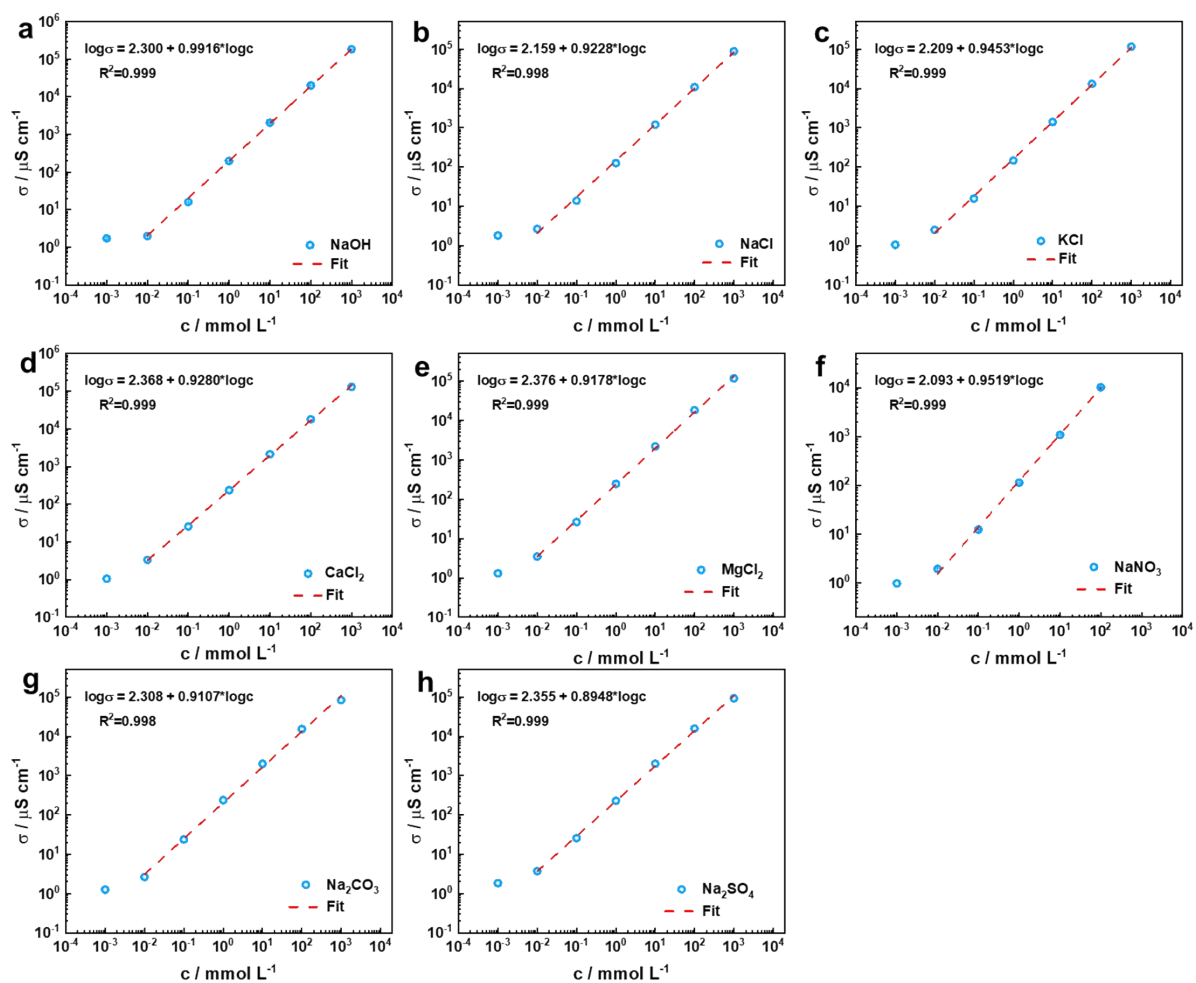

**Fig. S22** The relationship between conductivity ( $\sigma$ ) and concentration ( $c$ ),  $\lg(\sigma) = a + \lg(c)$ . (a) NaOH, (b) NaCl, (c) KCl, (d)  $\text{CaCl}_2$ , (e)  $\text{MgCl}_2$ , (f)  $\text{NaNO}_3$ , (g)  $\text{Na}_2\text{CO}_3$ , and (h)  $\text{Na}_2\text{SO}_4$  solution.

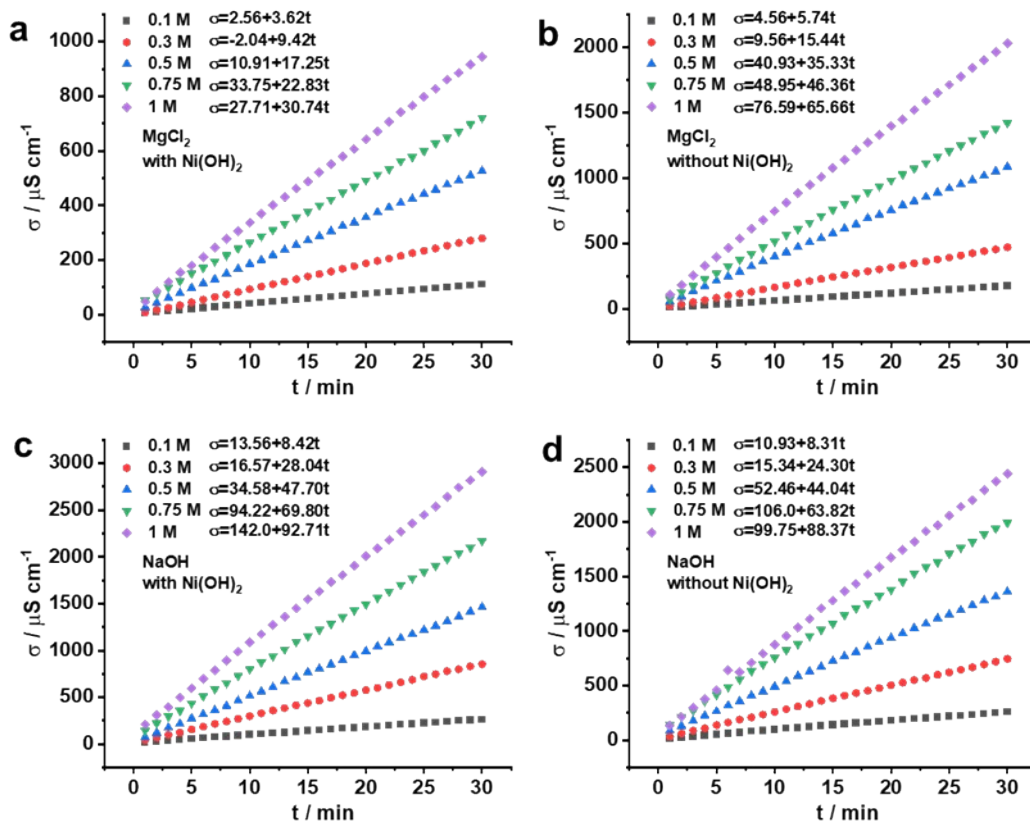

**Fig. S23** The conductivity ( $\sigma$ ) of MgCl<sub>2</sub> and NaOH solution with the measure time increase. The MgCl<sub>2</sub> solution through (a) the Ni(OH)<sub>2</sub> membrane coated substrate, and (b) nylon membrane substrate, NaOH solution through (c) the Ni(OH)<sub>2</sub> membrane coated substrate, and (d) substrate with concentration from 0.1 to 1 M.

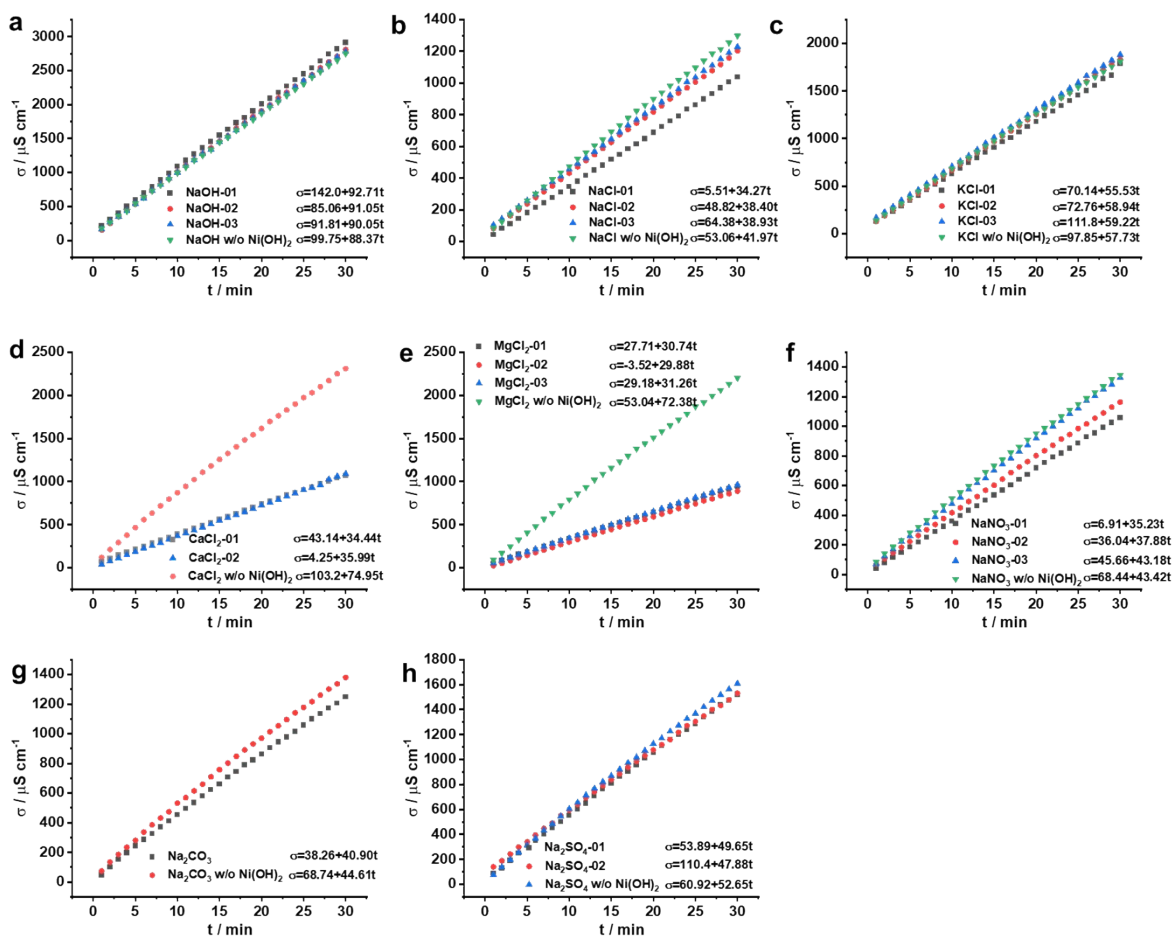

**Fig. S24** The conductivity ( $\sigma$ ) of the 1 M solutions with the measure time increase. (a) NaOH, (b) NaCl, (c) KCl, (d)  $\text{CaCl}_2$ , (e)  $\text{MgCl}_2$ , (f)  $\text{NaNO}_3$ , (g)  $\text{Na}_2\text{CO}_3$ , and (h)  $\text{Na}_2\text{SO}_4$  solution through the  $\text{Ni(OH)}_2$  membrane coated substrate, and nylon membrane substrate.

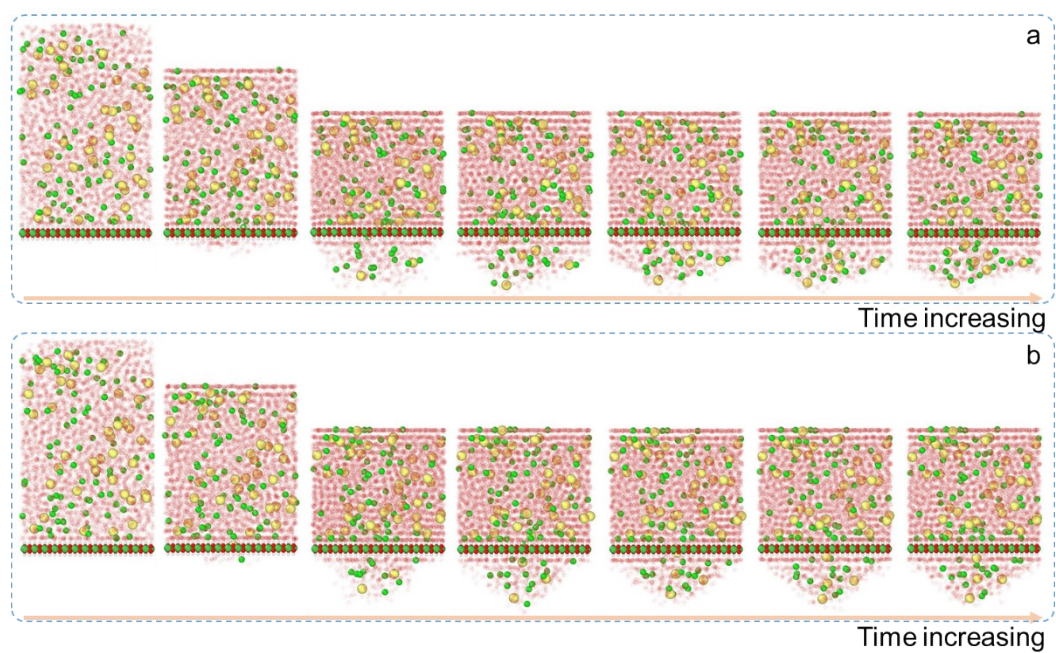

**Fig. S25** Simulation snapshots of  $\text{MgCl}_2$  solution through the opening monolayer  $\text{Ni}(\text{OH})_2$  nanosheet (a) without and (b) with positive charge.



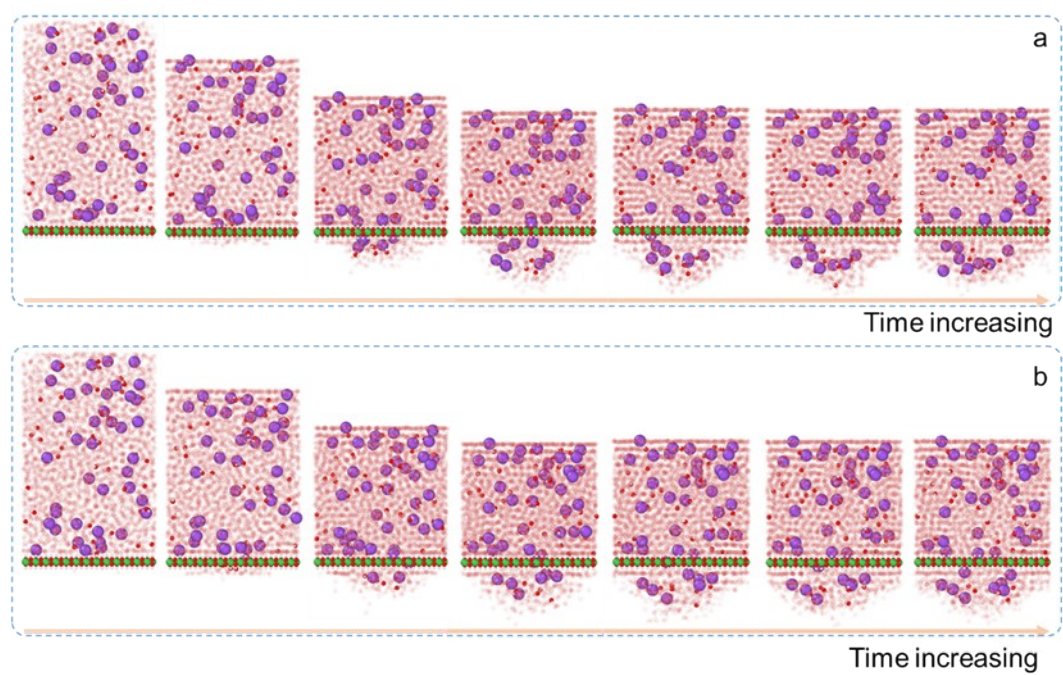

**Fig. S26** Simulation snapshots of NaOH solution through the opening monolayer Ni(OH)<sub>2</sub> nanosheet (a)without and (b) with positive charge.

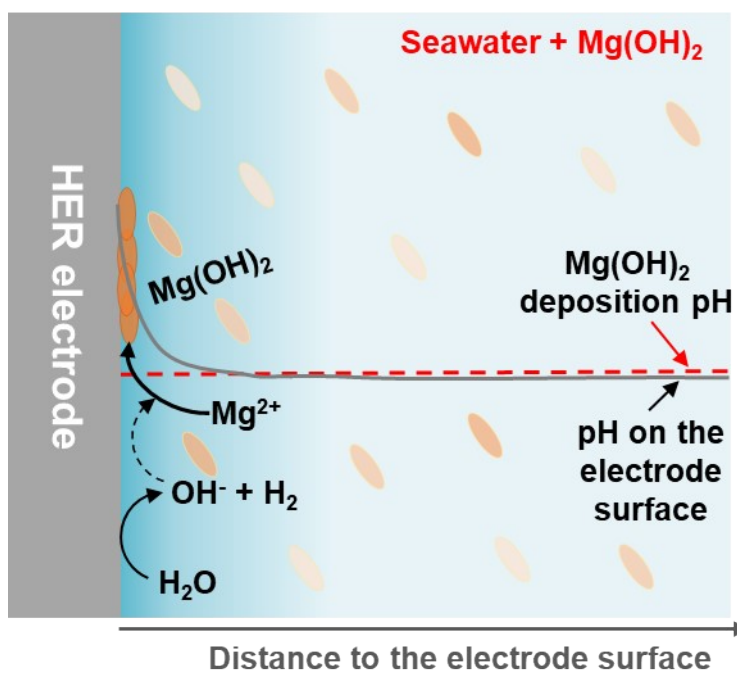

**Fig. S27** The schematic illustration of precipitation mechanism on HER electrode without  $\text{Ni}(\text{OH})_2$  membrane in seawater with saturated  $\text{Mg}(\text{OH})_2$ .



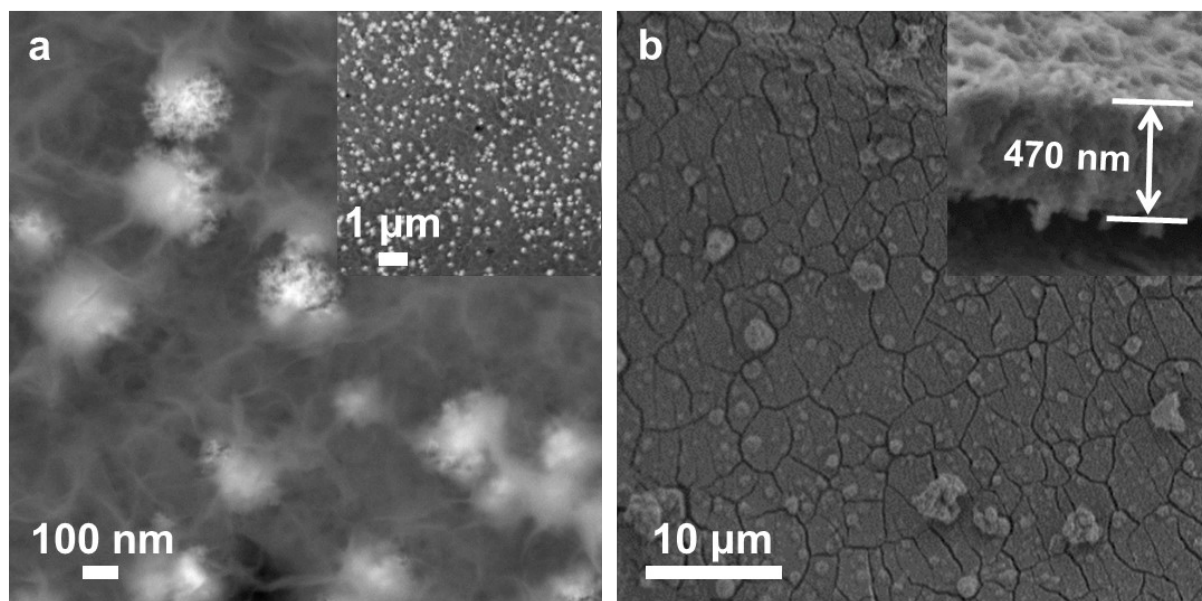

**Fig. S28** SEM images of (a) Pt-NF electrode under backscattered electron image model, and (b) Ni(OH)<sub>2</sub>-Pt-NF-3d electrode under secondary electron image model.

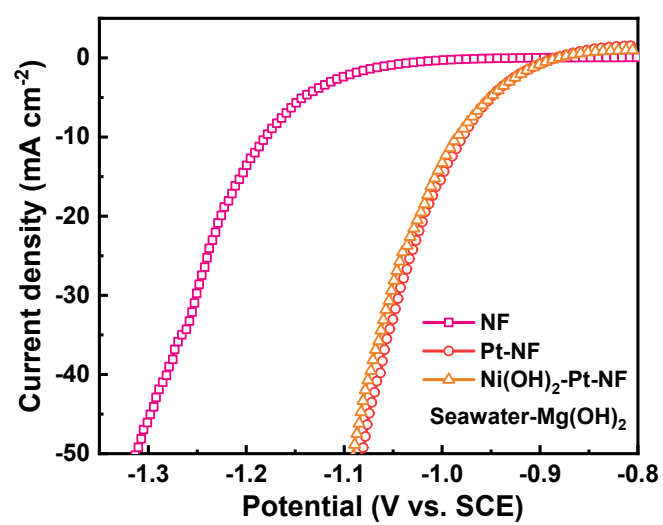

**Fig. S29** LSV curves of NF, Pt-NF and  $\text{Ni(OH)}_2\text{-Pt-NF}$  electrode in seawater with saturated  $\text{Mg(OH)}_2$ .

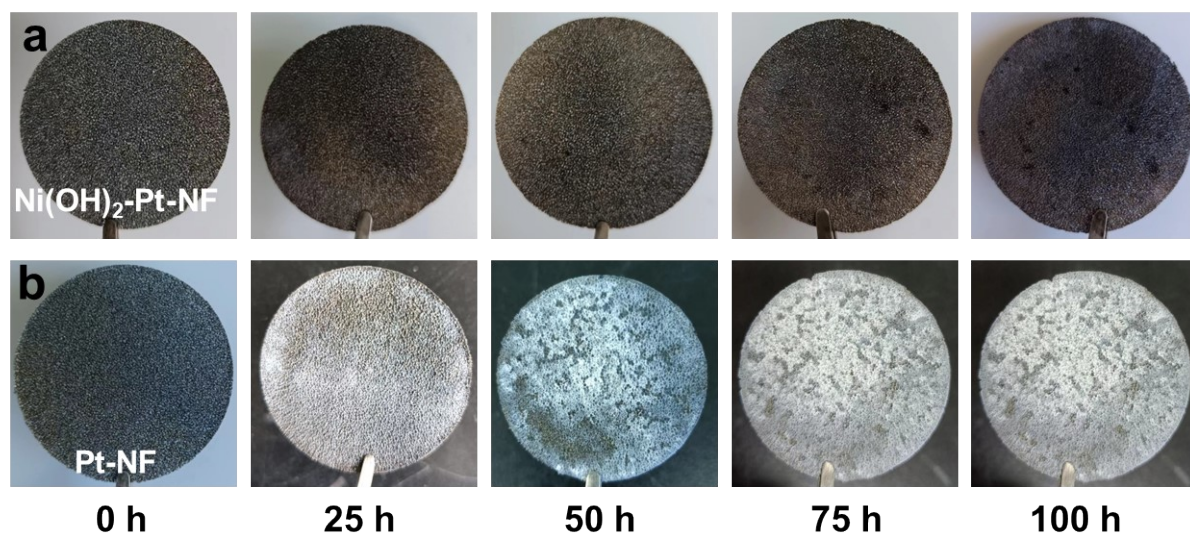

**Fig. S30** Photographs of (a)  $\text{Ni(OH)}_2\text{-Pt-NF}$  and (b) Pt-NF electrodes before and after test in seawater electrolyser.

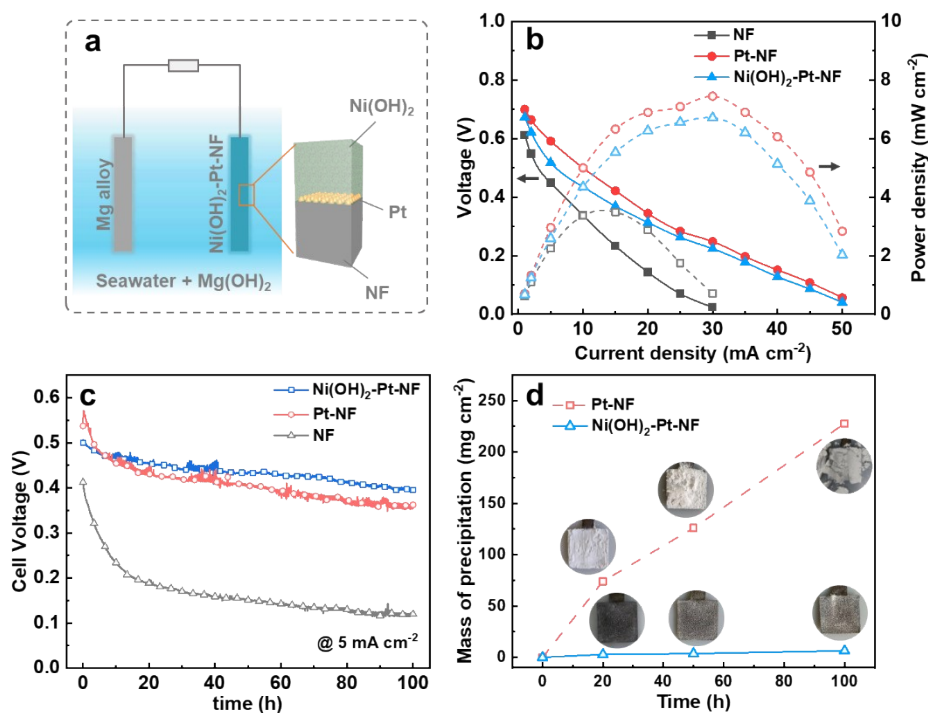

**Fig. S31** (a) The schematic illustration of MSWB equipped with Ni(OH)<sub>2</sub>-Pt-NF electrode. (b) The polarization and power density curves, (c) galvanostatic discharge of the MSWBs at current density of 5 mA cm<sup>-2</sup> equipped with Ni(OH)<sub>2</sub>-Pt-NF, Pt-NF, and NF electrodes. (d) Mass of precipitation on the Ni(OH)<sub>2</sub>-Pt-NF, and Pt-NF electrode at different discharge time with the corresponding photographs.

To verified the anti-precipitation performance of the membrane decorated electrode in application, we also assembled the magnesium seawater battery (MSWB) equipped with Ni(OH)<sub>2</sub>-Pt-NF cathode (HER electrode) and Mg alloy anode (Fig. S29a), which was tested in seawater with saturated Mg(OH)<sub>2</sub>. Due to the high activity of Pt, the Pt-NF and Ni(OH)<sub>2</sub>-Pt-NF electrode equipped MSWB exhibited higher performance than that of NF electrode (Fig. S29b). The highest output power density of MSWB equipped with Ni(OH)<sub>2</sub>-Pt-NF and Pt-NF electrode was 6.71 and 7.45 mW cm<sup>-2</sup> at 30 mA cm<sup>-2</sup>, which was much higher than that of NF electrode (3.49 mW cm<sup>-2</sup> at 15 mA cm<sup>-2</sup>). For 100 h discharge at current density of 5 mA cm<sup>-2</sup>, the Pt-NF electrode equipped MSWB exhibited higher discharge voltage than that of Ni(OH)<sub>2</sub>-Pt-NF electrode during the initial operation (Fig. S29c). With the time increasing, the MSWB voltage of Pt-NF electrode decreased faster than that of Ni(OH)<sub>2</sub>-Pt-NF electrode. At time of 6.5 h, they reached the same voltage, while at time of 100 h, the voltage of Ni(OH)<sub>2</sub>-Pt-NF electrode equipped MSWB was 40 mV higher than that of Pt-NF electrode, and about 275 mV higher than that of NF electrode. As a comparison, the different operation time MSWBs were carried out. As shown in Fig. S29d, the precipitation mass on the electrode was increased with time both for Ni(OH)<sub>2</sub>-Pt-NF and Pt-NF electrode equipped MSWBs. However, the precipitation mass on Ni(OH)<sub>2</sub>-Pt-NF electrode was much lower than that of Pt-NF electrode. Such as at time of 100 h, the precipitation mass on Ni(OH)<sub>2</sub>-Pt-NF electrode (6.43 mg cm<sup>-2</sup>) was only 2.23% to Pt-NF electrode (288 mg cm<sup>-2</sup>). It should be clarified that in the MSWB, the Mg alloy anode continuously supplied Mg<sup>2+</sup> into the seawater during operation to increase the precipitation mass on the cathode as compared to three-electrode test with AEM. The results verified that the Ni(OH)<sub>2</sub> membrane on electrode can obviously decrease the electrode surface precipitation.

**Table S1** Data analysis of the simulations.

|                                                                       |            | MgCl <sub>2</sub> solution |                 |                  | NaOH solution   |                 |                  |
|-----------------------------------------------------------------------|------------|----------------------------|-----------------|------------------|-----------------|-----------------|------------------|
|                                                                       |            | Mg <sup>2+</sup>           | Cl <sup>-</sup> | H <sub>2</sub> O | Na <sup>+</sup> | OH <sup>-</sup> | H <sub>2</sub> O |
| <b>Number of particles through Ni(OH)<sub>2</sub> at 7 ns</b>         | 0 charge   | 8                          | 19              | 556              | 8               | 6               | 555              |
|                                                                       | +10 charge | 4                          | 16              | 435              | 8               | 6               | 531              |
| <b>Mass transfer rate* (No. ns<sup>-1</sup>)</b>                      | 0 charge   | 2.75                       | 17.0            | 414              | 8.15            | 14.3            | 433              |
|                                                                       | +10 charge | 1.16                       | 15.7            | 383              | 5.90            | 13.7            | 378              |
| <b>Percentage transfer rate** (% ns<sup>-1</sup>)</b>                 | 0 charge   | 0.0687                     | 0.212           | 0.138            | 0.204           | 0.357           | 0.144            |
|                                                                       | +10 charge | 0.0291                     | 0.196           | 0.128            | 0.147           | 0.342           | 0.126            |
| <b>Ionic diffusion coefficient*** (cm<sup>2</sup> s<sup>-1</sup>)</b> |            | 0.706                      | 2.032           | -                | 1.334           | 5.273           | -                |

\* Mass transfer rate was calculated from the slopes of passing number of the ions or water molecules with the time, when the ions or molecules passed through the Ni(OH)<sub>2</sub> sheet with relatively constant speed.

\*\* Percentage transfer rate = Mass transfer rate / total number of the ion or molecular.

\*\*\* Data from handbook, W. M. Haynes, D. R. Lide, T. J. Bruno, CRC Handbook of Chemistry and Physics, 95th, CRC Press, Boca Raton 2014, p5-57.

## References

- 1 Q. Liu, Z. Yan, J. Gao, E. Wang, G. Sun, *ACS Appl. Mater. Interfaces*, 2020, **12**, 24683-24692.
- 2 W.G. Hoover, *Phys. Rev. A*, 1985, **31**, 1695-1697.
- 3 Q. Liu, X. Zhang, B.B. Jiang, J.F. Li, T. Li, X.Z. Shao, W.B. Cai, H.Y. Wang, Y.K. Zhang, *ACS Omega*, 2021, **6**, 14952-14962.
- 4 H. Li, J. Ma, D.G. Evans, T. Zhou, F. Li, X. Duan, *Chem. Mater.*, 2006, **18**, 4405-4414.
- 5 S. Plimpton, *J. Comput. Phys.*, 1995, **117**, 1-19.
